# Supplementary material for: Isolation and Characterization of the Novel Botulinum Neurotoxin A Subtype 6
Source: PubMed Central journal article supplement (PMC6200982; doi:10.1128/msphere.00466-18), 2018-10-24
Supplement: sph005182674sf1.pdf [file sph005182674sf1.pdf]

A2 MPFVNKQFNYKDPVNGVDIAYIKIPNAGQMOPVKAFKIHNKIWIWIPERDTFTNPEEGDLN 60  
A1 MPFVNKQFNYKDPVNGVDIAYIKIPNAGQMOPVKAFKIHNKIWIWIPERDTFTNPEEGDLN 60  
A6 MPFVNKQFNYKDPVNGVDIAYIKIPNAGQMOPVKAFKIHNKIWIWIPERDTFTNPEEGDLN 60  
\*\*\*\*\*

A2 PPPEAKQVPVSYDSTYLSTDNEKDNLYLKGVTKLFERIYSTDLGRMLLTSIVRGIPFWGG 120  
A1 PPPEAKQVPVSYDSTYLSTDNEKDNLYLKGVTKLFERIYSTDLGRMLLTSIVRGIPFWGG 120  
A6 PPPEAKQVPVSYDSTYLSTDNEKDNLYLKGVTKLFERIYSTDLGRMLLTSIVRGIPFWGG 120  
\*\*\*\*\*

A2 STIDTELKVIDTNCINVIQPDGSYRSEELNLVIGPSADIIQFECKSFQGHVNLNLRNGY 180  
A1 STIDTELKVIDTNCINVIQPDGSYRSEELNLVIGPSADIIQFECKSFQGHVNLNLRNGY 180  
A6 STIDTELKVIDTNCINVIQPDGSYRSEELNLVIGPSADIIQFECKSFQGHVNLNLRNGY 180  
\*\*\*\*\*:\*\*\*\*\*

A2 GSTQYIRFSPDFTFGFEESLEVDTNPLLGAGKFATDPAVTLAHELIIHAEHRLYGIAINPN 240  
A1 GSTQYIRFSPDFTFGFEESLEVDTNPLLGAGKFATDPAVTLAHELIIHAGHRLYGIAINPN 240  
A6 GSTQYIRFSPDFTFGFEESLEVDTNPLLGAGKFATDPAVTLAHELIIHAGHRLYGIAINPN 240  
\*\*\*\*\* \*\*\*\*\*

A2 RVFKVNTNAYYEMSGLEVSFEELRTFGGHDAKFIDSLQENEFRLYYNKFKDVA STLNKA 300  
A1 RVFKVNTNAYYEMSGLEVSFEELRTFGGHDAKFIDSLQENEFRLYYNKFKDIA STLNKA 300  
A6 RVFKVNTNAYYEMSGLEVSFEELRTFGGHDAKFIDSLQENEFRLYYNKFKDIA STLNKA 300  
\*\*\*\*\*:\*\*\*\*\*

A2 KSIIGTTASLQYMKNVFKEKYLLEDSTSGKFSVDKLFKDKLYKMLTEIYTEDNFVNFVKV 360  
A1 KSIIGTTASLQYMKNVFKEKYLLEDSTSGKFSVDKLFKDKLYKMLTEIYTEDNFVNFVKV 360  
A6 KSIIGTTASLQYMKNVFKEKYLLEDSTSGKFSVDKLFKDKLYKMLTEIYTEDNFVNFVKV 360  
\*\*\*:\*\*\*\*\*:\*\*\*\*

A2 INRKYTLNFDKAVFRINIVPENYTIKDGFNLRNTNLAANFNGQNTNINRNFTRLKNFT 420  
A1 LNRKYTLNFDKAVFKINIVPKVNYTIYDGFNLRNTNLAANFNGQNTNINNMNFTKLKNFT 420  
A6 LNRKYTLNFDKAVFKINIVPKVNYTIYDGFNLRNTNLAANFNGQNTNINNMNFAKLKNFT 420  
:\*\*\*\*\*:\*\*\*\*\*. \*\*\*\* \*\*\*\*\*.:\*\*::\*\*\*\*\*. \*\*:\*\*\*\*\*

A2 GLFEFYKLLCVRGIIIPFKTKSLDEGYNKALNDLCIKVNNWDLFFSPSEDNFTNDLNKVEE 480  
A1 GLFEFYKLLCVRGIIITSKTKSLDKGYNKALNDLCIKVNNWDLFFSPSEDNFTNDLNKVEE 480  
A6 GLFEFYKLLCVRGIIITSKTKSLDKGYNKALNDLCIKVNNWDLFFSPSEDNFTNDLNKVEE 480  
\*\*\*\*\* \*\*\*\*\*:\*\*\*\*\*:\*\*\*

A2 ITADTNIEAAEENISLDLIQQYYLTFDFDNEPENIS IENLSSDIIGQLELMPNIE RFPNG 540  
A1 ITS D TNIEAAEENISLDLIQQYYLTFDFDNEPENIS IENLSSDIIGQLELMPNIE RFPNG 540  
A6 ITS D TNIEAAEENISLDLIQQYYLTFDFDNEPENIS IENLSSDIIGQLELMPNIE RFPNG 540  
\*\*.:\*\*\*\*\*:\*\*\*\*\*:\*\*\*\*\* \*\*\*\*\*

A2 KKYELDKYTMFHYLRAQEFEHGDSRIILTNSAEAEALLKPNVAYTFFSSKYVKKINKAVEA 600  
A1 KKYELDKYTMFHYLRAQEFEHGKSRIALTNSVNEALLNPSRVY TFFSSDYVKKV NKATEA 600  
A6 KKYELDKYTMFHYLSAQEFEHGKSRIIDL TNSVNEALLNPSHVY TFFSSDYVKKV NKATEA 600  
\*\*\*\*\* \*\*\*\*\*.\*\*\* \*\*\*\*\*.:\*\*\*\*\*:\*. \*\*\*\*\*.\*\*\*\*\*:\*\*\*.\*\*\*

A2 FMFLNWAEEELVYDFTDETNEVTTMDKIADITIIIVPYIGPALNIGNMLSKGEFVEAII FTG 660  
A1 AMFLGWVEQLVYDFTDETSEVSTTDKIADITIIIPYIGPALNIGNMLYKDDFVGALIFSG 660  
A6 AMFLGWVEQLVYDFTDETSEVSTTDKIADITIIIPYIGPALNIGNMLYKDDFVGALIFSG 660  
\*\*\*.\*.\*:\*\*\*\*\*.\*\*:\*\*\*\*\*:\*\*\*\*\*:\*\*\*\*\*.\*\*:\*\*\* \*\*

A2 VVAMLEFIPEYALPVFGTFAIVSYIANKVLT VQTINNALS KRNEKWDEVYKYIVTNWLAK 720  
A1 AVILLEFIPEIAIPVLGT FALVSYIANKVLT VQTIDNALS KRNEKWDEVYKYIVTNWLAK 720
